# Supplementary material
Source: PubMed Central journal article supplement (PMC7587083)
Supplement: JCM.01573-20-s0003.pdf [file JCM.01573-20-s0003.pdf]

**Supplementary Table 2**

| Host species      | Number of isolate<br>(total) | Number of strains selected<br>for MIRU-VNTR analysis |
|-------------------|------------------------------|------------------------------------------------------|
| BCG (ref. strain) | 1                            | 1                                                    |
| Cattle            | 15                           | 11                                                   |
| Swine             | 4                            | 3                                                    |
| Cat               | 1                            | 1                                                    |
| Wild boar         | 2                            | 2                                                    |
| Fallow deer       | 2                            | 2                                                    |
| Sea lion          | 1                            | 1                                                    |
| Zebu              | 1                            | 1                                                    |
| Sika deer         | 1                            | 1                                                    |
| Red deer          | 4                            | 2                                                    |
| Lynx              | 2                            | 1                                                    |
| Raccoon           | 1                            | 1                                                    |
| Pot-bellied pig   | 1                            | n.d.                                                 |
| Bison             | 1                            | n.d.                                                 |
| Antelope          | 1                            | 1                                                    |
| Human             | 93                           | 93                                                   |
| Total             | 131                          | 12                                                   |
