# Supplementary material
Source: PubMed Central journal article supplement (PMC7587083)
Supplement: JCM.01573-20-s0004.pdf [file JCM.01573-20-s0004.pdf]

**Supplementary Table 3:**

| VNTR-<br>Locus | Total<br>number of<br>strains | Copy number |    |     |     |     |    |    |    |   |   |    |
|----------------|-------------------------------|-------------|----|-----|-----|-----|----|----|----|---|---|----|
|                |                               | 0           | 1  | 2   | 3   | 4   | 5  | 6  | 7  | 8 | 9 | 10 |
| 154            | 121                           | -           | -  | 121 | -   | -   | -  | -  | -  | - | - | -  |
| 424            | 121                           | 19          | 3  | 92  | 6   | -   | -  | 1  | -  | - | - | -  |
| 577            | 121                           | -           | -  | 1   | 31  | 4   | 83 | 2  | -  | - | - | -  |
| 580            | 121                           | 2           | -  | 7   | 106 | 1   | 5  | -  | -  | - | - | -  |
| 802            | 121                           | -           | 3  | 113 | 5   | -   | -  | -  | -  | - | - | -  |
| 960            | 121                           | -           | 10 | 110 | 1   | -   | -  | -  | -  | - | - | -  |
| 1644           | 121                           | -           | -  | 5   | 115 | 1   | -  | -  | -  | - | - | -  |
| 1955           | 121                           | -           | 19 | 2   | 90  | 3   | -  | -  | 6  | 1 | - | -  |
| 2059           | 121                           | -           | 5  | 116 | -   | -   | -  | -  | -  | - | - | -  |
| 2163b          | 121                           | -           | 2  | 57  | 22  | 38  | 1  | -  | 1  | - | - | -  |
| 2165           | 121                           | -           | -  | 1   | 4   | 8   | 45 | 45 | 17 | 1 | - | -  |
| 2347           | 121                           | -           | -  | 9   | 112 | -   | -  | -  | -  | - | - | -  |
| 2401           | 121                           | -           | -  | 5   | -   | 116 | -  | -  | -  | - | - | -  |
| 2461           | 121                           | -           | 1  | 2   | 33  | 33  | 49 | 3  | -  | - | - | -  |
| 2531           | 121                           | -           | -  | -   | -   | 121 | -  | -  | -  | - | - | -  |
| 2687           | 121                           | -           | 4  | 113 | 4   | -   | -  | -  | -  | - | - | -  |
| 2996           | 121                           | -           | -  | 7   | 10  | 12  | 84 | 8  | -  | - | - | -  |
| 3007           | 121                           | -           | 8  | 16  | 93  | 2   | 2  | -  | -  | - | - | -  |
| 3171           | 121                           | -           | -  | 10  | 111 | -   | -  | -  | -  | - | - | -  |
| 3192           | 121                           | -           | -  | 12  | 105 | 4   | -  | -  | -  | - | - | -  |

|       |     |   |     |     |    |    |    |    |   |   |   |    |
|-------|-----|---|-----|-----|----|----|----|----|---|---|---|----|
| 3690  | 121 | - | 2   | 107 | 11 | 1  | -  | -  | - | - | - | -  |
| 4052  | 121 | - | 2   | 7   | 11 | 22 | 52 | 21 | 6 | - | - | -  |
| 4156  | 121 | 7 | 114 | -   | -  | -  | -  | -  | - | - | - | -  |
| 4348  | 121 | - | 5   | 116 | -  | -  | -  | -  | - | - | - | -  |
| 2163a | 27  | - | -   | -   | -  | 6  | -  | 1  | - | - | 6 | 14 |

---
