# Supplementary material
Source: PubMed Central journal article supplement (PMC7587083)
Supplement: JCM.01573-20-s0005.pdf [file JCM.01573-20-s0005.pdf]

**Supplementary Table 4:**

| VNTR-locus | HGDI   |
|------------|--------|
| 154        | 0      |
| 2059       | 0.0799 |
| 2531       | 0      |
| 1644       | 0.0957 |
| 802        | 0.1266 |
| 3171       | 0.1529 |
| 960        | 0.168  |
| 4348       | 0.0799 |
| 2401       | 0.0799 |
| 4156       | 0.1099 |
| 580        | 0.2291 |
| 2687       | 0.1267 |
| 3192       | 0.238  |
| 2347       | 0.1388 |
| 3690       | 0.2112 |
| 424        | 0.3974 |
| 1955       | 0.4222 |
| 3007       | 0.3901 |
| 577        | 0.4663 |
| 2996       | 0.4978 |
| 2163b      | 0.6514 |
| 2163a      | 0.6553 |
| 2461       | 0.692  |

2165

0.7039

4052

0.7439

---
