# Supplementary material
Source: PubMed Central journal article supplement (PMC7587083)
Supplement: JCM.01573-20-s0007.pdf [file JCM.01573-20-s0007.pdf]

**Supplementary Table 6**

| Defined clades<br>(61) | Corresponding d350<br>groups and strains |
|------------------------|------------------------------------------|
| Af1                    | 08                                       |
| Af2                    | mbov-118                                 |
| Eu1                    | 07                                       |
| Eu2                    | 06                                       |
| PZA sus                |                                          |
| unknown1               | mbov-49                                  |
| Unknown2               | 13                                       |
| Unknown3               | 10, 11, 12<br>01, 02, 03, 04,            |
| Unknown4               | mbov-59                                  |
| Unknown5               | -                                        |
| Unknown6               | -                                        |
| Unknown7               | mbov-119                                 |

PZA sus: Pyrazinamide susceptible
