# Supplementary material
Source: PubMed Central journal article supplement (PMC7587083)
Supplement: JCM.01573-20-s0008.pdf [file JCM.01573-20-s0008.pdf]

|        |   |   |   |   |    |
|--------|---|---|---|---|----|
| SB1452 |   | x |   |   | 06 |
| SB1681 |   | x |   |   | 06 |
| SB2331 | x |   |   |   | 08 |
| SB0944 | x |   | x |   | 08 |
| SB0989 |   |   |   | x | 09 |
| SB0141 |   | x |   |   | 07 |
| SB0134 |   |   | x | x | 13 |
| SB1003 |   |   | x |   | 13 |
| SB0288 |   |   | x |   | 11 |
| SB0829 |   |   | x |   | 10 |
| SB1231 |   |   | x |   | 10 |
| SB1572 |   |   | x |   | 10 |
| SB1694 |   |   | x |   | 12 |
| SB2414 |   |   | x |   | 11 |
| SB2466 |   |   | x |   | 11 |
| SB0833 |   |   |   | x | 01 |
| SB0852 |   |   |   | x | 04 |
| SB0860 |   |   |   | x | 01 |

|        |   |   |   |   |           |
|--------|---|---|---|---|-----------|
| SB0870 |   |   | x |   | 01        |
| SB0871 |   |   | x |   | 03        |
| SB0961 |   |   | x |   | 01        |
| SB1596 |   |   | x |   | 02        |
| SB0136 |   |   |   | x | ungrouped |
| SB0844 |   |   |   | x | ungrouped |
| SB0920 |   |   |   | x | ungrouped |
| SB1898 |   | X |   |   | ungrouped |
| SB1176 | x |   |   |   | ungrouped |
| SB0267 |   | x |   |   | ungrouped |

---

2

3

4

5
