# Supplementary material
Source: PubMed Central journal article supplement (PMC7587083)

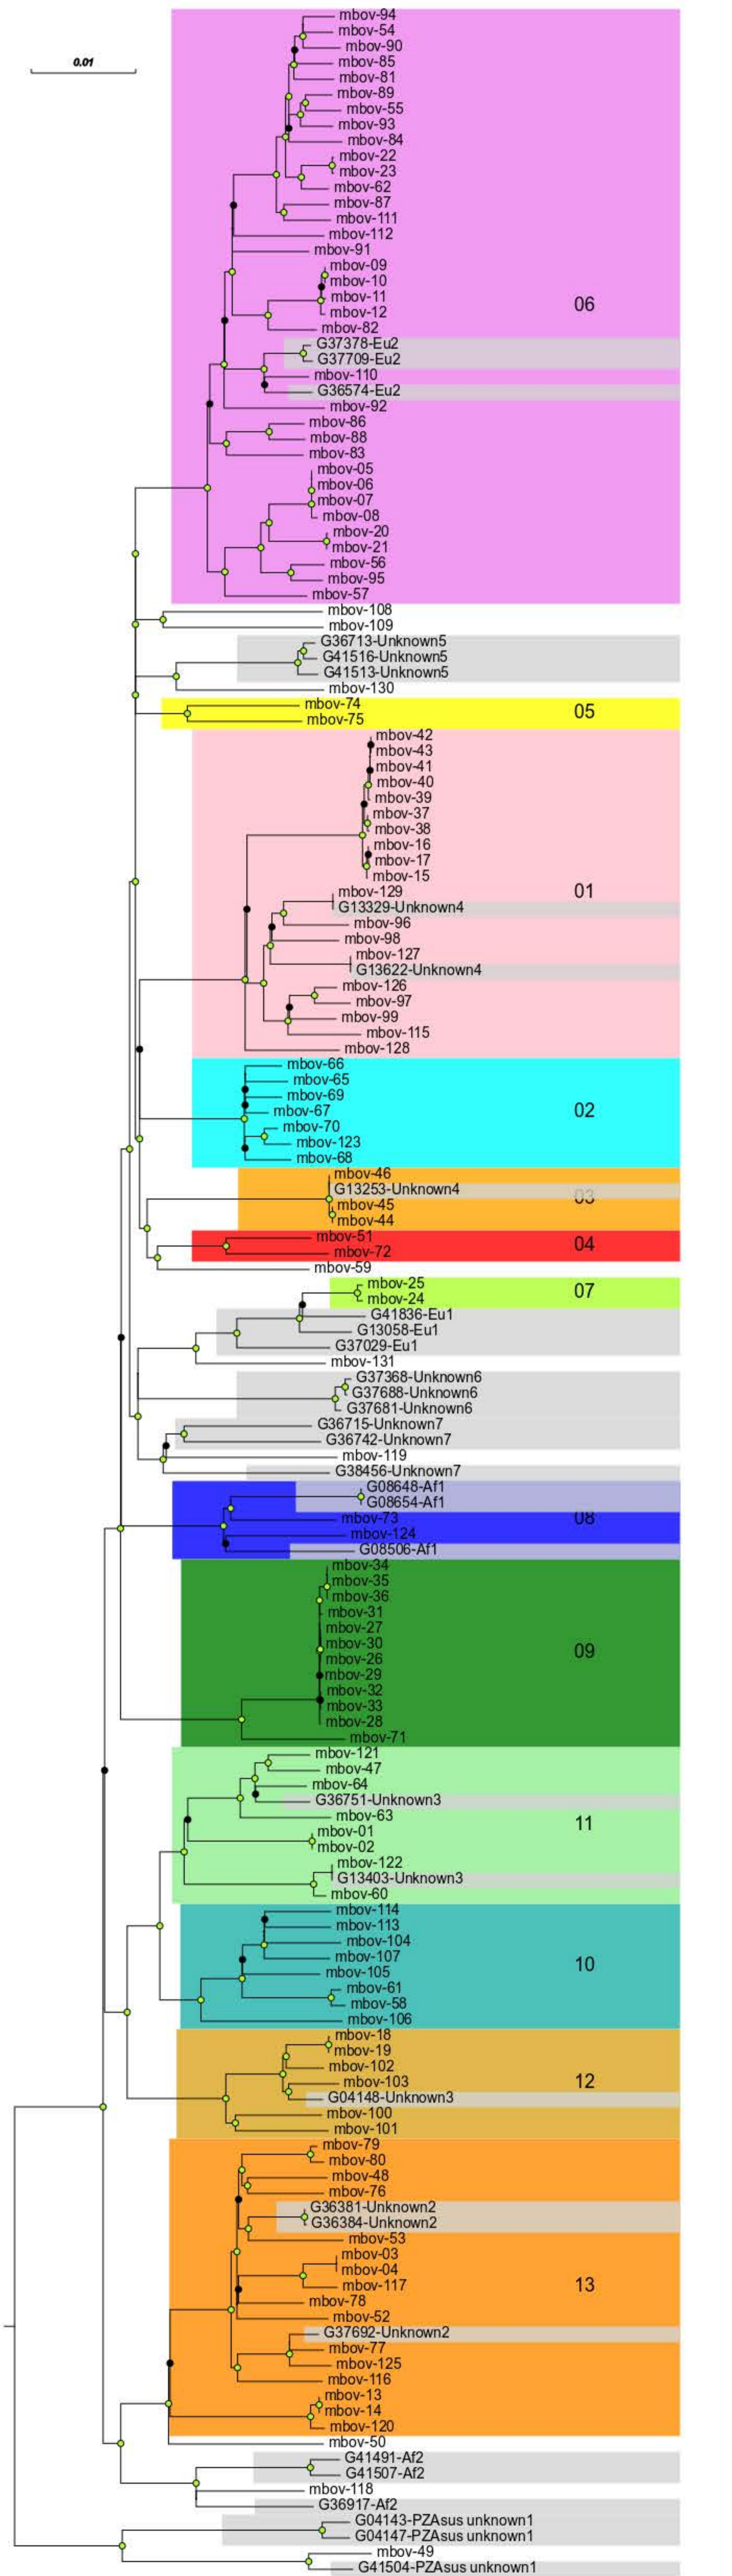

Supplement: JCM.01573-20-s0001.pdf [file JCM.01573-20-s0001.pdf]
